# Supplementary material for: Electrical and Thermal Conductivities of Single CuxO Nanowires
Source: MDPI journal article supplement (doi:10.3390/nano13212822), 2023-10-25
Supplement: s1 [file s1]

# Electrical and Thermal Conductivities of Single Cu<sub>x</sub>O Nanowires

Ivan De Carlo <sup>1,2</sup>, Luisa Baudino <sup>3</sup>, Petr Klapetek <sup>4</sup>, Mara Serrapede <sup>3</sup>, Fabio Michieletti <sup>1,3</sup>, Natascia De Leo <sup>1</sup>, Fabrizio Pirri <sup>3,5,\*</sup>, Luca Boarino <sup>1</sup>, Andrea Lamberti <sup>3,5</sup> and Gianluca Milano <sup>1,\*</sup>

<sup>1</sup> Advanced Materials Metrology and Life Sciences Division, Istituto Nazionale di Ricerca Metrologica (INRiM), 10135 Turin, Italy; ivan.decarlo@polito.it (I.D.C.); fabio.michieletti@polito.it (F.M.); n.deleo@inrim.it (N.D.L.); l.boarino@inrim.it (L.B.)

<sup>2</sup> Department of Electronics and Telecommunications, Politecnico di Torino, 10129 Turin, Italy

<sup>3</sup> Department of Applied Science and Technology, Politecnico di Torino, 10129 Turin, Italy; luisa.baudino@polito.it (L.B.); mara.serrapede@polito.it (M.S.); andrea.lamberti@polito.it (A.L.)

<sup>4</sup> Czech Metrology Institute, Okružní 31, 638 00 Brno, Czech Republic; pklapetek@cmi.cz

<sup>5</sup> Center for Sustainable Future Technologies @Polito, Istituto Italiano di Tecnologia (IIT), 10144 Turin, Italy

\* Correspondence: fabrizio.pirri@polito.it (C.F.P.); g.milano@inrim.it (G.M.)

**Table S1.** Rietveld refinement main parameters for the cuprite and tenorite crystals.

| Cuprite          |   |                    |         |                      | Tenorite         |   |                    |         |                        |        |                        |       |
|------------------|---|--------------------|---------|----------------------|------------------|---|--------------------|---------|------------------------|--------|------------------------|-------|
| 9007497          |   |                    |         |                      | 9016105          |   |                    |         | 9014580                |        |                        |       |
| value            |   |                    |         |                      | error            |   | value              |         | Error                  | value  |                        | error |
| Cell parameters  | a | Å                  | 4.2865  | 6 · 10 <sup>-4</sup> | Cell parameters  | a | Å                  | 4.6998  | 1.3 · 10 <sup>-3</sup> | 4.5978 | 1.7 · 10 <sup>-3</sup> |       |
|                  | b | Å                  |         |                      |                  | b | Å                  | 3.4274  | 9 · 10 <sup>-4</sup>   | 3.3233 | 7 · 10 <sup>-4</sup>   |       |
|                  | c | Å                  |         |                      |                  | c | Å                  | 5.1501  | 1.4 · 10 <sup>-3</sup> | 5.850  | 1.2 · 10 <sup>-3</sup> |       |
|                  | α | °                  | 90      |                      |                  | β | °                  | 99.389  | 1.3 · 10 <sup>-2</sup> | 99.500 | 1.7 · 10 <sup>-2</sup> |       |
| Crystalline size |   | Å                  | 754     | 38                   | Crystalline size |   | Å                  | 461     | 18                     | 2530   | 20                     |       |
| Microstrain      |   |                    | 0.00310 | 9 · 10 <sup>-5</sup> | Microstrain      |   |                    | 0.00260 | 1.4 · 10 <sup>-4</sup> | 0.0035 | 2 · 10 <sup>-4</sup>   |       |
| Density          |   | g·cm <sup>-3</sup> | 6.0336  |                      | Density          |   | g·cm <sup>-3</sup> | 6.4553  |                        |        |                        |       |
| Weight           |   | ± 0.9 %            | 44.2 %  |                      | Weight           |   | ± 0.9 %            | 55.8 %  |                        |        |                        |       |

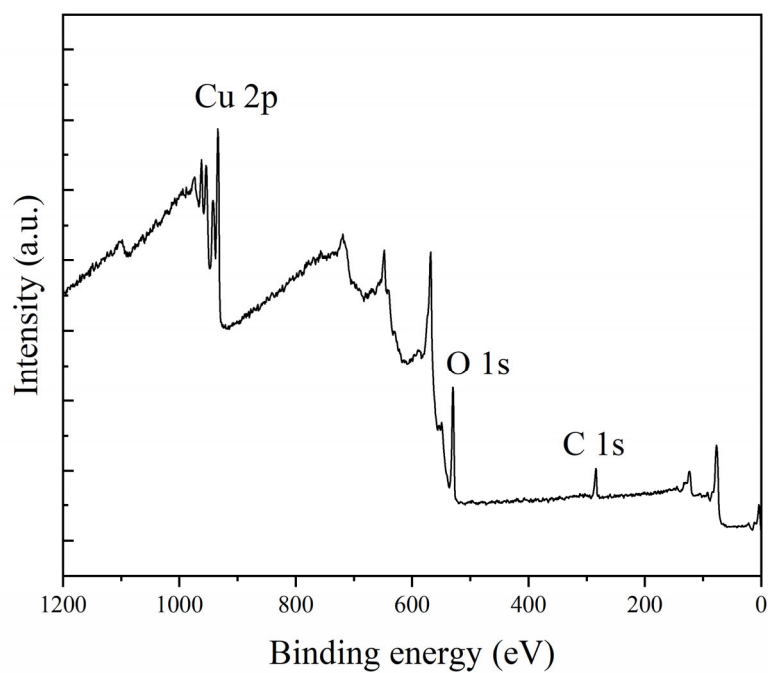

**Figure S1.** XPS survey scan of the NWs sample.

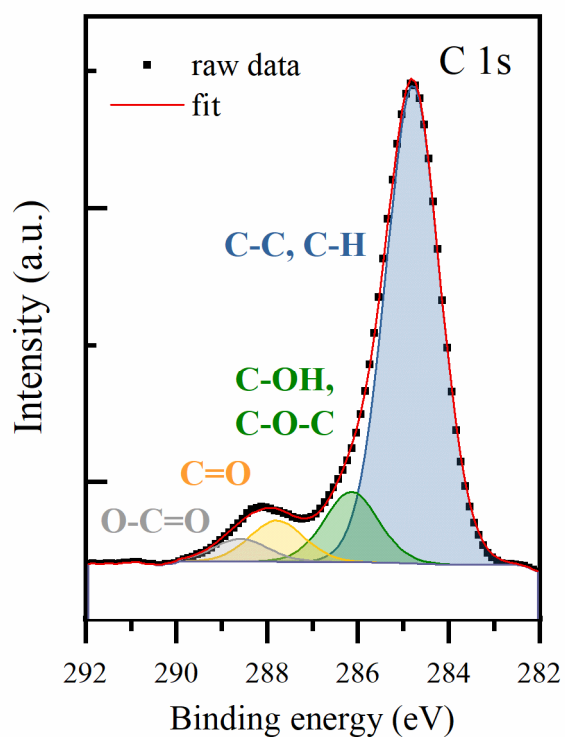

**Figure S2.** XPS HR scan of the C 1s region for calibration on the adventitious carbon, and deconvolution of the peak.
